# Supplementary material
Source: PubMed Central journal article supplement (PMC7675026)
Supplement: nxaa260_supplemental_file.pdf [file nxaa260_supplemental_file.pdf]

High-Dose Neonatal Vitamin A Supplementation to Bangladeshi Infants Increases the Percentage of CCR9-Positive Treg Cells in Infants with Lower Birthweight in Early Infancy, and Decreases Plasma sCD14 Concentration and the Prevalence of Vitamin A Deficiency at Two Years of Age. S.M. Ahmad.

### Online Supplemental Material

**Supplemental Table 1:** P-values from mixed linear regression analysis (described in Methods section) assessing effect of vitamin A treatment group on child growth z-scores (weight-for-age, WAZ; length-for-age, LAZ; and weight-for-length, WLZ); plasma retinol, C-reactive protein (CRP) and soluble CD14 (sCD14); peripheral blood Treg cell percentage (Treg); and percentage of CD4 and CD8 T-cells, Treg cells and B cells expressing chemokine receptor 9 (CCR9).

| Variable                                 | WAZ     | LAZ     | WLZ     | Retinol | CRP     | sCD14   | Treg    | CCR9-CD4 | CCR9-CD8 | CCR9-Treg | CCR9-B  |
|------------------------------------------|---------|---------|---------|---------|---------|---------|---------|----------|----------|-----------|---------|
| <b>Main Effects</b>                      |         |         |         |         |         |         |         |          |          |           |         |
| Treatment Group                          | 0.6318  | 0.3634  | 0.6768  | 0.0502  | 0.1769  | 0.0915  | 0.6507  | 0.4086   | 0.8512   | 0.5861    | 0.1761  |
| Sex                                      | 0.4996  | 0.2581  | 0.8539  | 0.8442  | 0.5199  | 0.3867  | 0.1031  | 0.3626   | 0.4268   | 0.0004    | 0.0978  |
| BWM Category                             | <0.0001 | <0.0001 | 0.1813  | 0.0772  | 0.2573  | 0.8371  | 0.3848  | 0.7164   | 0.8135   | 0.4245    | 0.5441  |
| Age of Visit                             | <0.0001 | <0.0001 | <0.0001 | <0.0001 | <0.0001 | <0.0001 | <0.0001 | 0.0004   | <0.0001  | 0.8281    | <0.0001 |
| Delivery Type                            | 0.7373  | 0.5754  | 0.7196  | 0.6243  | 0.4676  | 0.3062  | 0.8904  | 0.6240   | 0.2117   | 0.4209    | 0.3835  |
| Month                                    | 0.0261  | 0.1274  | 0.1450  | 0.2394  | 0.8087  | 0.0034  | <0.0001 | <0.0001  | 0.0004   | <0.0001   | <0.0001 |
| <b>Interactions with Treatment Group</b> |         |         |         |         |         |         |         |          |          |           |         |
| Group*BWM                                | 0.5203  | 0.0802  | 0.5206  | 0.4689  | 0.1626  | 0.3417  | 0.9671  | 0.0207   | 0.8282   | 0.0005    | 0.0622  |
| Group*Sex                                | 0.7418  | 0.9476  | 0.7636  | 0.5836  | 0.5651  | 0.9407  | 0.6005  | 0.5085   | 0.8982   | 0.3560    | 0.8921  |
| Group*Age                                | 0.3699  | 0.1399  | 0.4170  | 0.4874  | 0.4369  | 0.0269  | 0.8475  | 0.1480   | 0.2383   | 0.6077    | 0.1823  |
| Group*BWM*Age                            | 0.2293  | 0.0728  | 0.4158  | 0.1176  | 0.2635  | 0.3571  | 0.2724  | 0.9046   | 0.0693   | 0.8594    | 0.2729  |
| Group*Sex*BWM                            | 0.1672  | 0.4314  | 0.2749  | 0.0816  | 0.8807  | 0.7759  | 0.6065  | 0.5010   | 0.0450   | 0.9554    | 0.8212  |
| Group*Sex*Age                            | 0.5762  | 0.5232  | 0.2970  | 0.2732  | 0.6362  | 0.2380  | 0.0719  | 0.5808   | 0.5496   | 0.2398    | 0.5634  |
| Group* Sex*BWM*Age                       | 0.0011  | 0.4525  | 0.0259  | 0.1631  | 0.9241  | 0.3723  | 0.4277  | 0.1288   | 0.6746   | 0.5454    | 0.2177  |
| <b>Other Interactions</b>                |         |         |         |         |         |         |         |          |          |           |         |
| BWM*Age                                  | 0.1000  | 0.0039  | 0.0032  | 0.2478  | 0.6564  | 0.9624  | 0.3625  | 0.5615   | 0.1624   | 0.7525    | 0.9744  |
| Sex*BWM                                  | 0.0180  | 0.8080  | 0.0079  | 0.5296  | 0.9937  | 0.7716  | 0.8045  | 0.3459   | 0.6115   | 0.1305    | 0.5739  |
| Sex*Age                                  | 0.1409  | 0.0126  | 0.8304  | 0.1583  | 0.7535  | 0.0286  | 0.0054  | 0.9327   | 0.5232   | 0.6687    | 0.5533  |
| Sex* BWM*Age                             | 0.1868  | 0.8506  | 0.2119  | 0.8592  | 0.8682  | 0.8024  | 0.0767  | 0.9151   | 0.3810   | 0.4299    | 0.0347  |
| Delivery Type*Age                        | 0.7838  | 0.4445  | 0.2157  | 0.0730  | 0.0907  | 0.6782  | 0.0025  | 0.7478   | 0.0184   | 0.1903    | 0.6986  |
| Month*Age                                | 0.0136  | 0.0567  | 0.0031  | 0.0032  | 0.7840  | 0.5575  | 0.0566  | 0.0112   | 0.2185   | 0.0003    | 0.9695  |

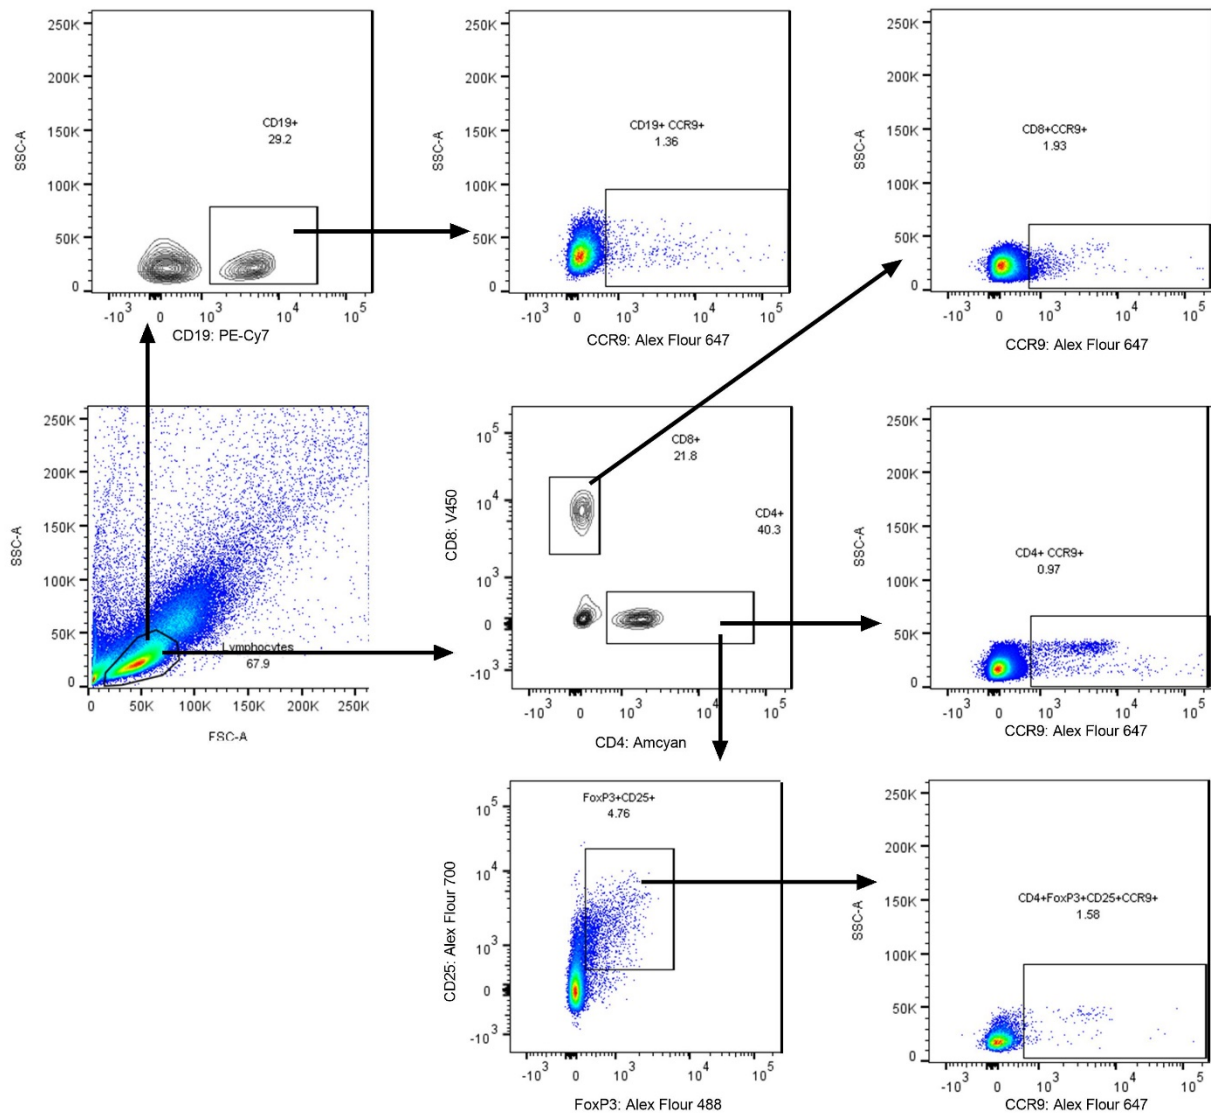

**Supplemental Figure 1:** Flow cytometric analysis of mucosa targeting B and T-cells. PBMC was isolated from obtained blood was stained with CD4, CD8, CD19, CD25, CCR9 and FoxP3 markers and analyzed by flow-cytometry.
